# Supplementary material
Source: PubMed Central journal article supplement (PMC9036144)
Supplement: sj-pdf-1-hpq-10.1177_1359105321991630.pdf [file sj-pdf-1-hpq-10.1177_1359105321991630.pdf]

## Supplementary Tables

### Supplementary table 1.

a) Stepwise multivariate logistic regression for GHQ-28 without including PSS-10 and IESR.

| <b>GHQ-28 (reference: low)</b>                                                             |           |                 |              |                |
|--------------------------------------------------------------------------------------------|-----------|-----------------|--------------|----------------|
|                                                                                            | <b>OR</b> | <b>95% C.I.</b> |              | <b>P-value</b> |
|                                                                                            |           | <b>Lower</b>    | <b>Upper</b> |                |
| Gender (reference: male)                                                                   | 1.49      | 0.74            | 3.00         | 0.27           |
| Profession (reference: Post graduate trainee/ Clinical fellow/ Senior attending physician) | 1.51      | 0.71            | 3.21         | 0.29           |
| Travel history                                                                             | 2.15      | 0.76            | 6.09         | 0.15           |

b) Stepwise multivariate logistic regression for GHQ-28 including PSS-10 only.

| <b>GHQ-28 (reference: low)</b>                                                             |           |                 |              |                |
|--------------------------------------------------------------------------------------------|-----------|-----------------|--------------|----------------|
|                                                                                            | <b>OR</b> | <b>95% C.I.</b> |              | <b>P-value</b> |
|                                                                                            |           | <b>Lower</b>    | <b>Upper</b> |                |
| Profession (reference: Post graduate trainee/ Clinical fellow/ Senior attending physician) | 1.78      | 0.83            | 3.80         | 0.14           |
| Travel history                                                                             | 1.97      | 0.68            | 5.75         | 0.21           |
| COVID exposure                                                                             | 0.64      | 0.30            | 1.38         | 0.25           |
| PSS-10 (reference: low)                                                                    | 5.12      | 1.06            | 24.79        | <b>0.04</b>    |

c) Stepwise multivariate logistic regression for GHQ-28 including IESR only.

| <b>GHQ-28 (reference: low)</b>       |           |                 |              |                   |
|--------------------------------------|-----------|-----------------|--------------|-------------------|
|                                      | <b>OR</b> | <b>95% C.I.</b> |              | <b>P-value</b>    |
|                                      |           | <b>Lower</b>    | <b>Upper</b> |                   |
| Living arrangement (reference: none) | 0.64      | 0.30            | 1.37         | 0.25              |
| Travel hx                            | 2.35      | 0.81            | 6.83         | 0.11              |
| IESR (reference: no concern)         | 7.04      | 2.63            | 18.88        | <b>&lt;0.0001</b> |

**Supplementary table 2.**

a) Association between PSS-10 and IESR.

|                          |                     | <b>IESR categories</b> |                                                                      |              |
|--------------------------|---------------------|------------------------|----------------------------------------------------------------------|--------------|
|                          |                     | No concern for PTSD    | Clinical concern/Probable diagnosis of PTSD/Suppressed immune system | P-value      |
| <b>PSS-10 categories</b> | Low/Moderate stress | 99 (94.3)              | 35 (77.8)                                                            | <b>0.005</b> |
|                          | High stress         | 6 (5.7)                | 10 (22.2)                                                            |              |

b) Association between PSS-10 and GHQ-28.

|                          |                     | <b>GHQ-28 categories</b>   |                             |             |
|--------------------------|---------------------|----------------------------|-----------------------------|-------------|
|                          |                     | Low risk of acute distress | High risk of acute distress | P-value     |
| <b>PSS-10 categories</b> | Low/Moderate stress | 60 (96.8)                  | 74 (84.1)                   | <b>0.01</b> |
|                          | High stress         | 2 (3.2)                    | 14 (15.9)                   |             |

c) Association between IESR and GHQ-28.

|                        |                                                                       | <b>GHQ-28 categories</b>   |                             |                   |
|------------------------|-----------------------------------------------------------------------|----------------------------|-----------------------------|-------------------|
|                        |                                                                       | Low risk of acute distress | High risk of acute distress | P-value           |
| <b>IESR categories</b> | No concern for PTSD                                                   | 56 (90.3)                  | 49 (55.7)                   | <b>&lt;0.0001</b> |
|                        | Clinical concern/ Probable diagnosis of PTSD/Suppressed immune system | 6 (9.7)                    | 39 (44.3)                   |                   |
